# Supplementary material for: Methylfolate Trap Promotes Bacterial Thymineless Death by Sulfa Drugs
Source: PubMed Central journal article supplement (PMC5070874; doi:10.1371/journal.ppat.1005949), 2016-10-19
Supplement: ppat.1005949.s002.pdf [file ppat.1005949.s002.pdf]

*M. smegmatis*

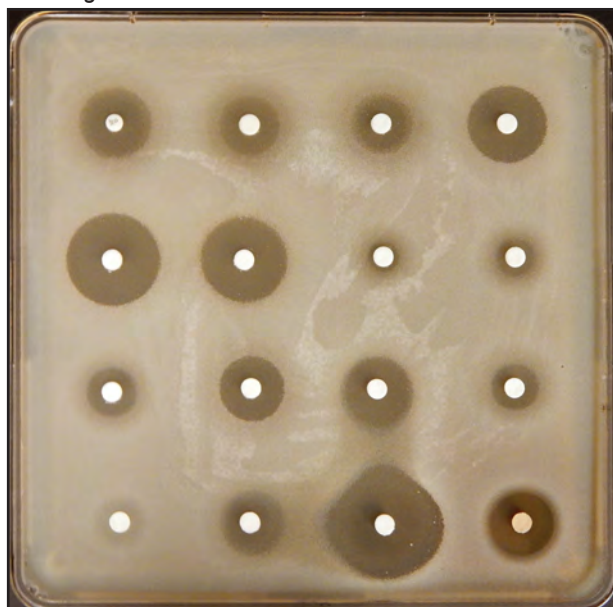

*Ms $\Delta$ metH*

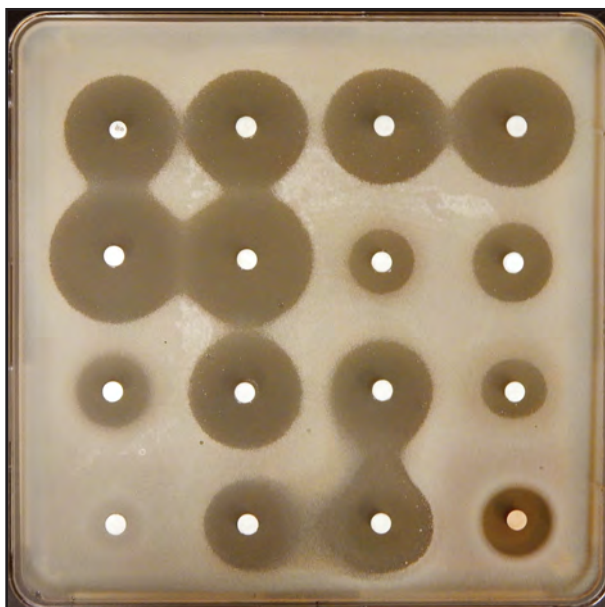

Test Information

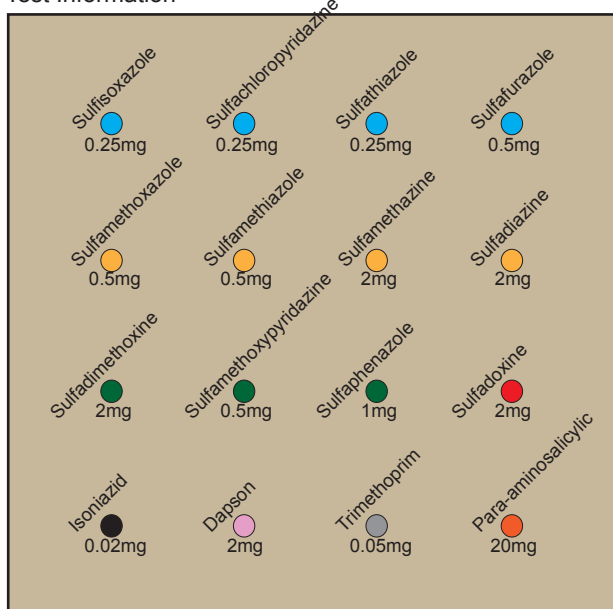

*Ms $\Delta$ metH/metH*

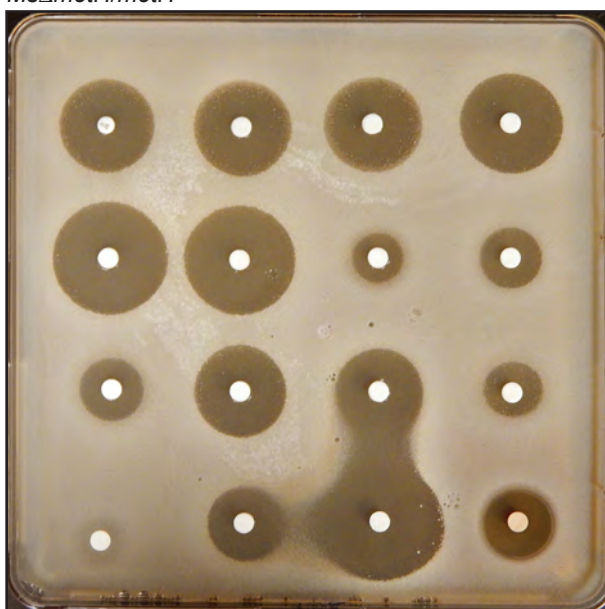

- Short-acting Sulfa
- Intermediate-acting Sulfa
- Long-acting Sulfa
- Ultra long-acting Sulfa
- TB drug, potential folate inhibitor
- Sulfone
- DHFR inhibitor
- TB drug, folate inhibitor
