# Supplementary material for: Methylfolate Trap Promotes Bacterial Thymineless Death by Sulfa Drugs
Source: PubMed Central journal article supplement (PMC5070874; doi:10.1371/journal.ppat.1005949), 2016-10-19
Supplement: ppat.1005949.s003.pdf [file ppat.1005949.s003.pdf]

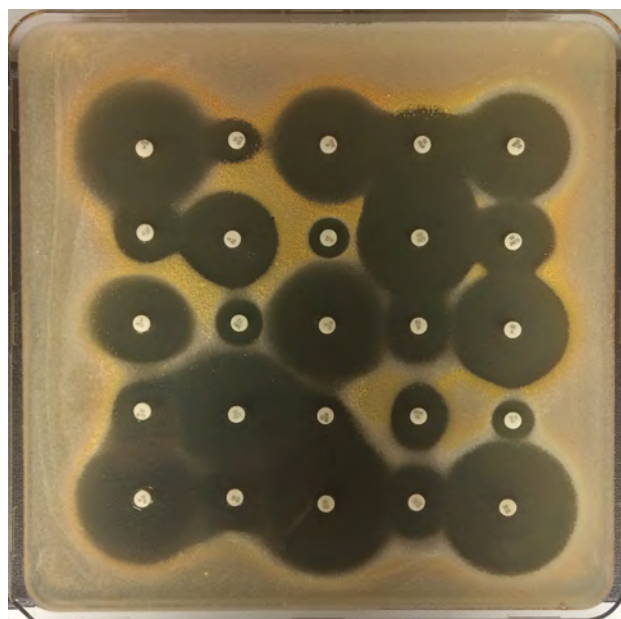

*M. smegmatis*

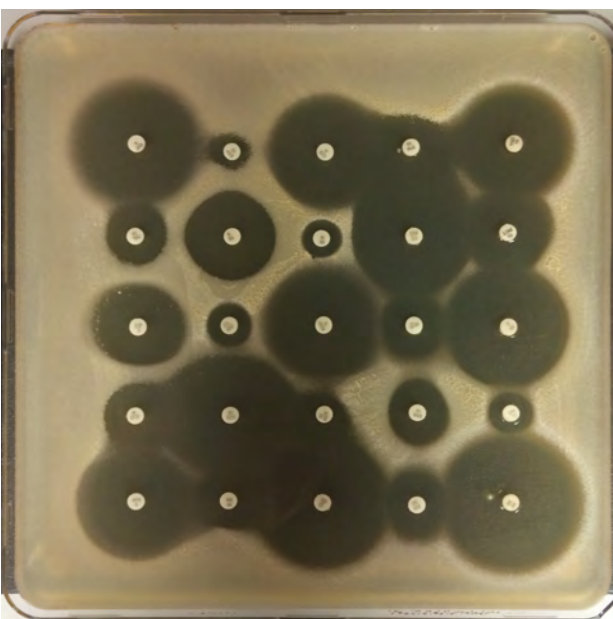

*MsΔmeth*

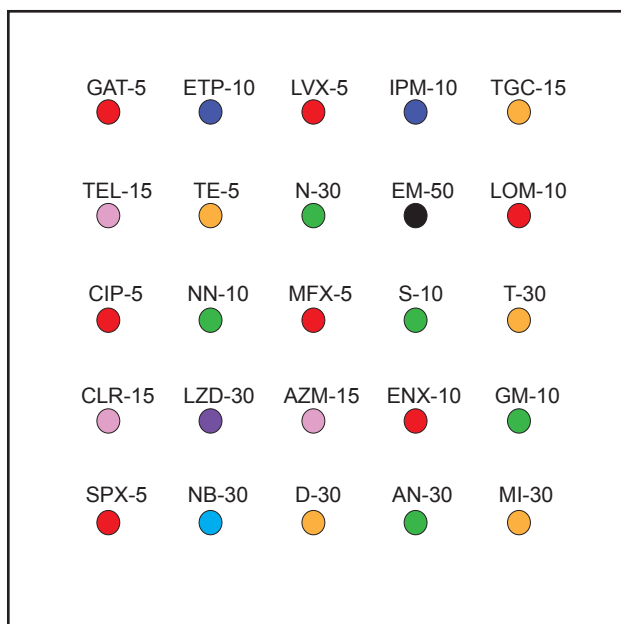

| Code   | Antibiotic      | Class                    | Target                 | Pathway                           |
|--------|-----------------|--------------------------|------------------------|-----------------------------------|
| ETP-10 | Ertepenem       | β-lactams                | Peptidoglycan (PBPs)   | Cell wall synthesis               |
| IPM-10 | Imipenem        |                          |                        |                                   |
| CLR-15 | Clarithromycin  | Macrolides               |                        |                                   |
| AZM-15 | Azithromycin    |                          |                        |                                   |
| TEL-15 | Telithromycin   |                          |                        |                                   |
| GM-10  | Gentamycin      | Aminoglycosides          | Ribosome               | Protein synthesis                 |
| AN-30  | Amikacin        |                          |                        |                                   |
| S-10   | Streptomycin    |                          |                        |                                   |
| N-30   | Neomycin        |                          |                        |                                   |
| NN-10  | Tobramycin      |                          |                        |                                   |
| LZD-30 | Linezolid       | Oxazolidinones           |                        |                                   |
| TE-5   | Tetracycline    | Tetracycline antibiotics |                        |                                   |
| MI-30  | Minocycline     |                          |                        |                                   |
| D-30   | Doxycycline     |                          |                        |                                   |
| T-30   | Oxytetracycline |                          |                        |                                   |
| TGC-15 | Tygecycline     |                          |                        |                                   |
| NB-30  | Novobiocin      | Aminocoumarins           |                        |                                   |
| ENX-10 | Enoxacin        | Quinolones               | DNA gyrase             | DNA replication                   |
| GAT-5  | Gatifloxacin    |                          |                        |                                   |
| CIP-5  | Ciprofloxacin   |                          |                        |                                   |
| LOM-10 | Lomefloxacin    |                          |                        |                                   |
| SPX-5  | Sparfloxacin    |                          |                        |                                   |
| LVX-5  | Levofloxacin    |                          |                        |                                   |
| MFX-5  | Moxifloxacin    |                          |                        |                                   |
| EM-50  | Ethambutol      | Antimycobacterial        | Arabinogalactan (EmbC) | Mycobacterial cell wall synthesis |
