# Supplementary material for: Methylfolate Trap Promotes Bacterial Thymineless Death by Sulfa Drugs
Source: PubMed Central journal article supplement (PMC5070874; doi:10.1371/journal.ppat.1005949), 2016-10-19
Supplement: ppat.1005949.s008.pdf [file ppat.1005949.s008.pdf]

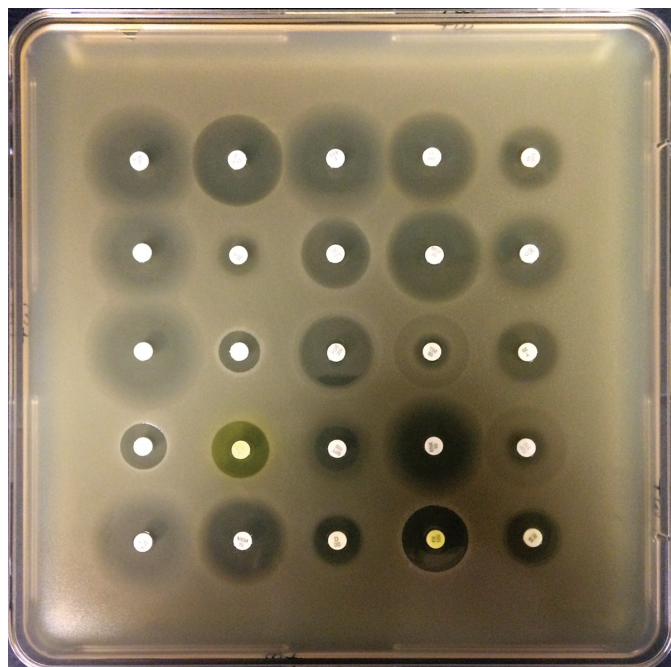

*St. meth(+)*

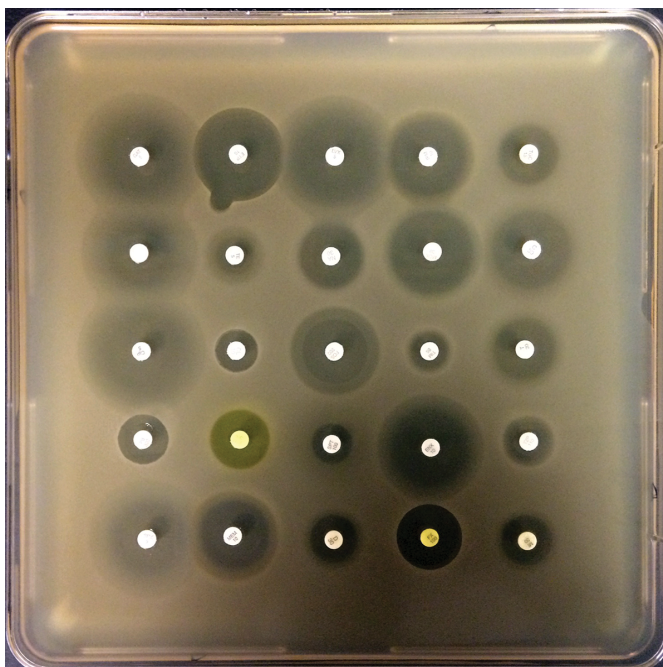

*St. meth(-)*

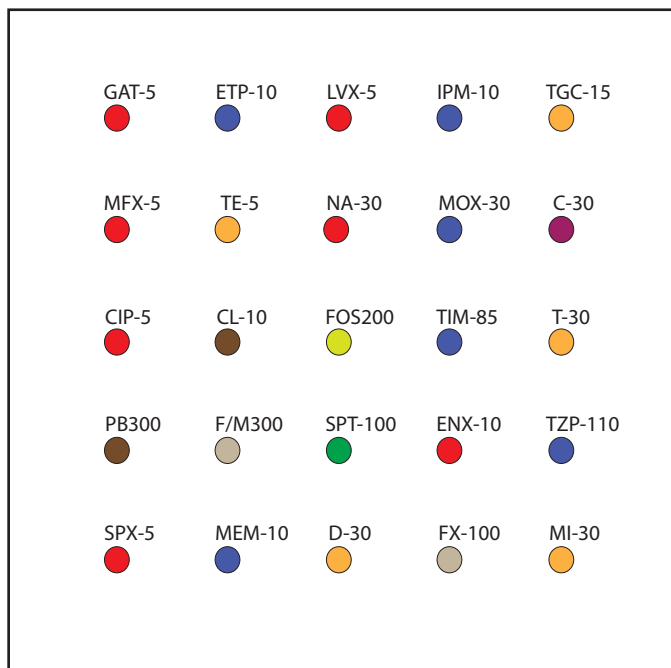

| Code    | Antibiotic              | Class          | Target               | Pathway             |
|---------|-------------------------|----------------|----------------------|---------------------|
| ETP-10  | Ertepenem               | β-lactams      | Peptidoglycan (PBPs) | Cell wall synthesis |
| IPM-10  | Imipenem                |                |                      |                     |
| MEM-10  | Meropenem               |                |                      |                     |
| MOX-30  | Moxalactam              |                |                      |                     |
| TIM-85  | Ticarcillin/Clavulanic  |                |                      |                     |
| TZP-110 | Piperacillin/Tazobactam |                |                      |                     |
| FOS200  | Fosfomycin              | Phosphonics    | MurA                 | Membrane integrity  |
| CL-10   | Colistin                | Polymyxins     | LPS                  |                     |
| PB-300  | Polymyxin B             | Aminocyclitols | Ribosome             | Protein synthesis   |
| SPT-100 | Spectinomycin           |                |                      |                     |
| C-30    | Chloramphenicol         | Amphenicols    |                      |                     |
| TE-5    | Tetracycline            | Tetracyclines  | Ribosome             | Protein synthesis   |
| MI-30   | Minocycline             |                |                      |                     |
| D-30    | Doxycycline             |                |                      |                     |
| T-30    | Oxytetracycline         |                |                      |                     |
| TGC-15  | Tygecycline             | Quinolones     | DNA gyrase           | DNA replication     |
| NA-30   | Nalidixic Acid          |                |                      |                     |
| ENX-10  | Enoxacin                |                |                      |                     |
| GAT-5   | Gatifloxacin            | Nitrofurans    | DNA                  | Mutagenesis         |
| CIP-5   | Ciprofloxacin           |                |                      |                     |
| MFX-5   | Moxifloxacin            |                |                      |                     |
| SPX-5   | Sparfloxacin            |                |                      |                     |
| LVX-5   | Levofloxacin            |                |                      |                     |
| FX-100  | Furazolidone            |                |                      |                     |
| F/M300  | Nitrofurantoin          |                |                      |                     |
