# Supplementary material for: Methylfolate Trap Promotes Bacterial Thymineless Death by Sulfa Drugs
Source: PubMed Central journal article supplement (PMC5070874; doi:10.1371/journal.ppat.1005949), 2016-10-19

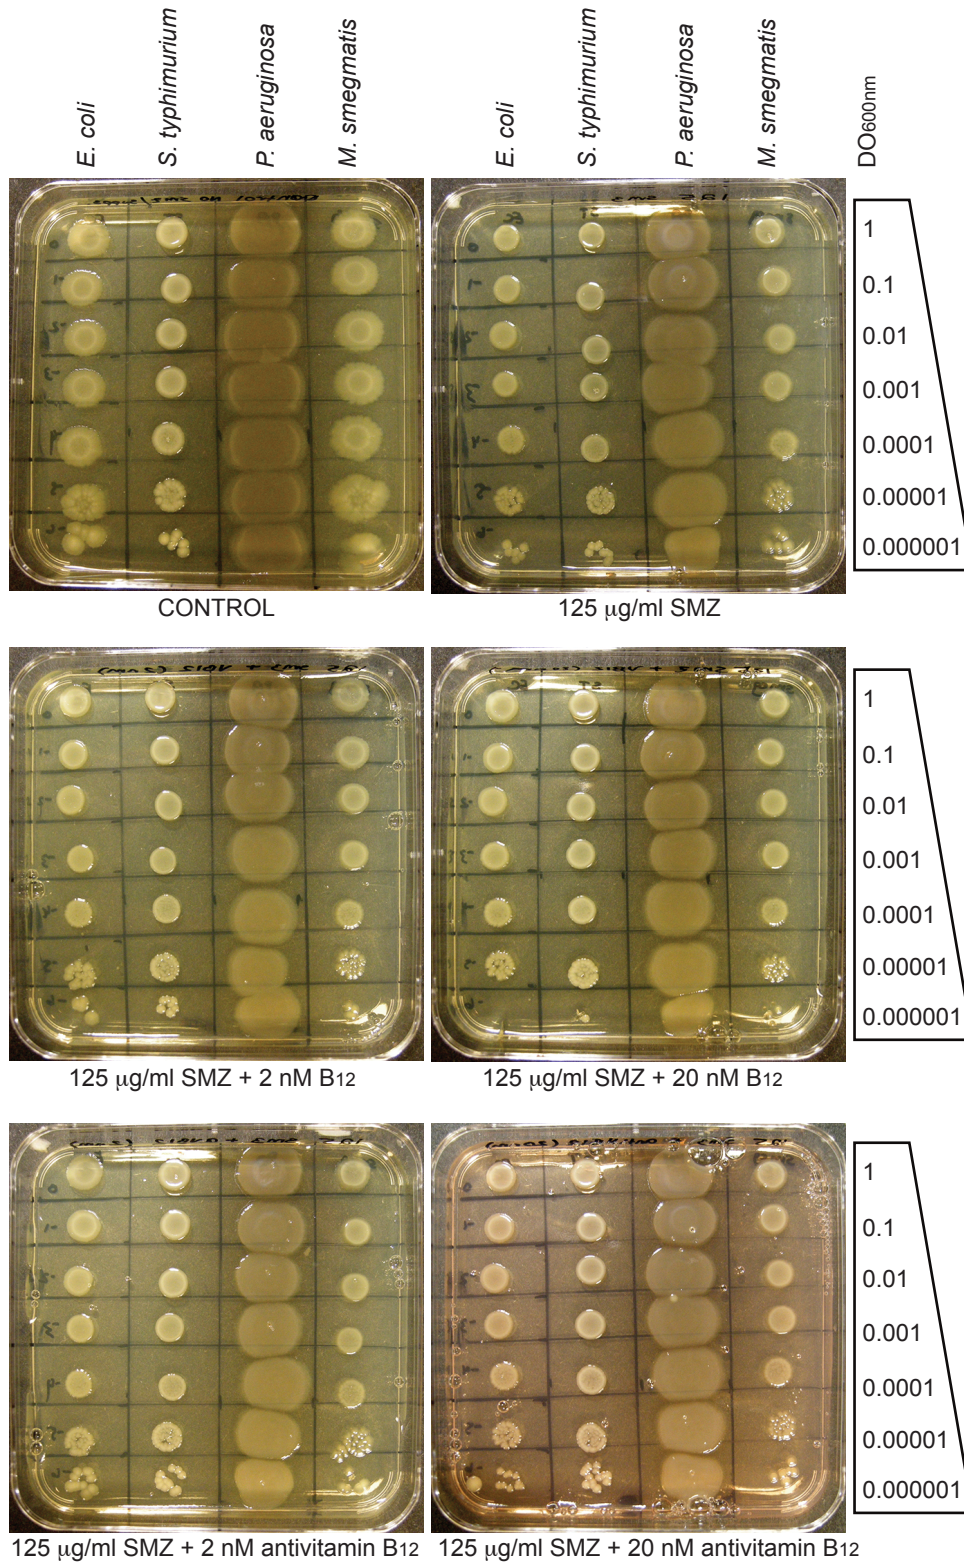

Supplement: ppat.1005949.s011.pdf [file ppat.1005949.s011.pdf]
